# Supplementary material
Source: PubMed Central journal article supplement (PMC5291018)
Supplement: supp_pp.16.01108_PP2016-01108R1_Supplemental_Material.pdf [file supp_pp.16.01108_PP2016-01108R1_Supplemental_Material.pdf]

1 **SUPPLEMENTAL FILES**

2 **Supplemental File S1. MS/MS spectra of the characterized metabolites**

3 See separate file, Supplemental File S1.pdf

4

5 **Supplemental Figure S1. GPC chromatographic comparison of lignin from *C2-Idf* mutant and *C2***  
6 **control stem and leaf. (A)** The dashed line shows the standard curve ( $R^2=0.9962$ ) of polystyrene with  
7 12 data points. The molecular weight distribution curves were each divided into three peaks and the  
8 Mn, Mw, and polydispersity index (Mw/Mn) of each peak were analyzed and shown in the table (B).  
9 Peak 1 represent an abnormal large molecular weight for lignin samples and was therefore regarded  
10 as an unknown contaminant, the peak 2 represented the major lignin polymer and peak 3 originated  
11 from lignin oligolignols with molecular weight at around 800-1000. Statistics were performed on  
12 peak 2. The Mn, Mw and Mw/Mn values of stem and the Mn value of leaf were not significantly  
13 different between the *C2-Idf* mutant and *C2* control (Student t-test, p-value>0.05). The Mw and  
14 Mw/Mn values of leaf were significantly different between the *C2-Idf* mutant and *C2* control (8%  
15 increase in *C2-Idf* as compared to *C2*, Student t-test, p-value=0.03 for Mw, and 4% increase, Student  
16 t-test, p-value=0.04 for Mn/Mw). Average  $\pm$  standard deviation are given for 4 to 6 biological  
17 replicates.

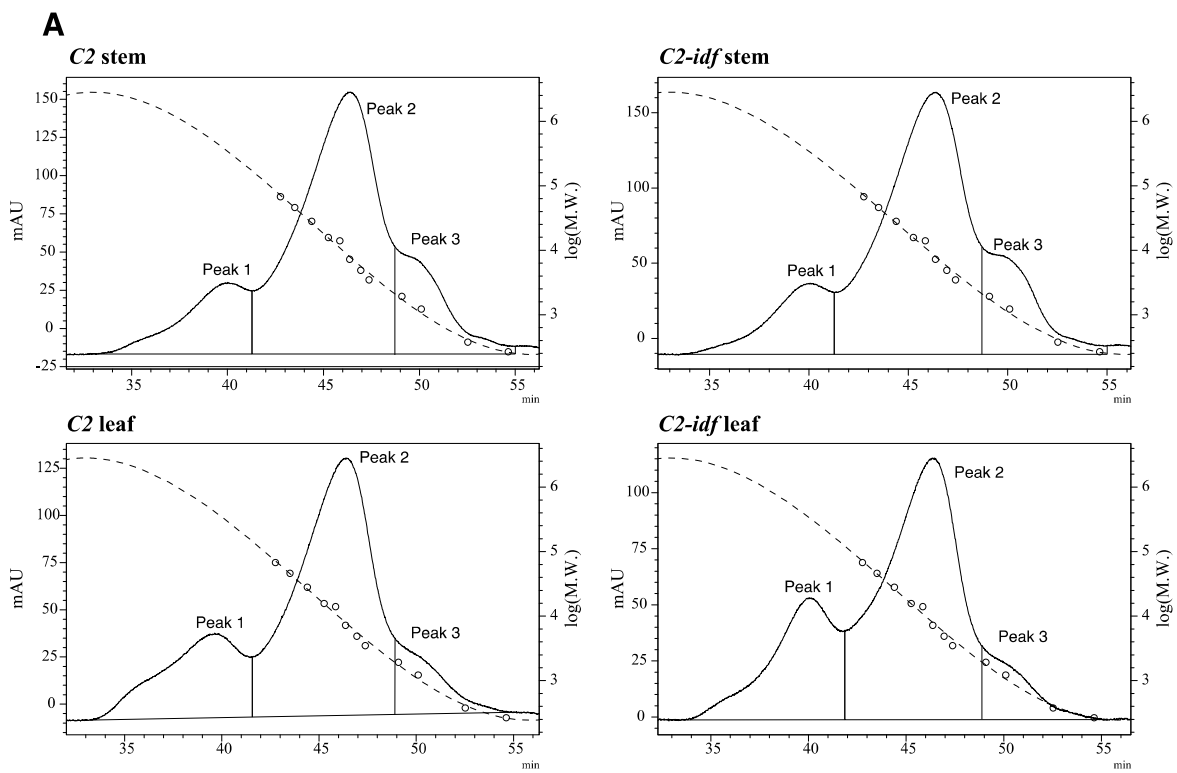

**B**

| <i>C2</i> stem |                    |                    |                 | <i>C2-Idf</i> stem |                    |                     |                 |
|----------------|--------------------|--------------------|-----------------|--------------------|--------------------|---------------------|-----------------|
|                | Mn                 | Mw                 | Mw/Mn           |                    | Mn                 | Mw                  | Mw/Mn           |
| Peak 1         | 421200 $\pm$ 37000 | 720000 $\pm$ 66500 | 1.71 $\pm$ 0.03 | Peak 1             | 477100 $\pm$ 55300 | 812300 $\pm$ 112500 | 1.70 $\pm$ 0.08 |
| Peak 2         | 8500 $\pm$ 300     | 25000 $\pm$ 1400   | 2.95 $\pm$ 0.06 | Peak 2             | 8300 $\pm$ 300     | 24200 $\pm$ 1400    | 2.92 $\pm$ 0.06 |
| Peak 3         | 810 $\pm$ 50       | 1100 $\pm$ 30      | 1.34 $\pm$ 0.04 | Peak 3             | 900 $\pm$ 80       | 1100 $\pm$ 50       | 1.29 $\pm$ 0.06 |
| <i>C2</i> leaf |                    |                    |                 | <i>C2-Idf</i> leaf |                    |                     |                 |
|                | Mn                 | Mw                 | Mw/Mn           |                    | Mn                 | Mw                  | Mw/Mn           |
| Peak 1         | 507100 $\pm$ 23700 | 891700 $\pm$ 42200 | 1.76 $\pm$ 0.05 | Peak 1             | 405300 $\pm$ 76700 | 710200 $\pm$ 144600 | 1.75 $\pm$ 0.05 |
| Peak 2         | 8000 $\pm$ 300     | 21100 $\pm$ 1000   | 2.62 $\pm$ 0.05 | Peak 2             | 8400 $\pm$ 300     | 22900 $\pm$ 1100    | 2.71 $\pm$ 0.07 |
| Peak 3         | 800 $\pm$ 20       | 1100 $\pm$ 10      | 1.33 $\pm$ 0.02 | Peak 3             | 800 $\pm$ 80       | 1000 $\pm$ 60       | 1.38 $\pm$ 0.06 |

19 **Supplemental Table S1. Growth parameters of *C2-ldf* mutant and *C2* control plants.** Plant height and dry biomass measurements were performed on  
 20 senesced greenhouse-grown plants. DW: dry weight; SEM: standard error of the mean with n=12; n.s.: not significantly different; underlined values:  
 21 significantly different compared to the control; \*:0.05≥p>0.01, \*\*: p<0.01.

22

| Growth parameter              | <i>C2</i><br>(mean ± SEM) | <i>C2-ldf</i><br>(mean ± SEM) | % difference | t-test |
|-------------------------------|---------------------------|-------------------------------|--------------|--------|
| Plant height with tassel (cm) | 296.33 ± 17.78            | 292.01 ± 19.01                | -1.4         | n.s.   |
| Leaf DW (g)                   | 36.11 ± 6.71              | <u>45.13</u> ± <u>6.20</u>    | 25           | *      |
| Stem DW (g)                   | 90.79 ± 31.45             | <u>121.80</u> ± <u>28.08</u>  | 34.16        | **     |
| Total DW (g) (leaves + stems) | 126.90 ± 37.76            | <u>166.94</u> ± <u>33.94</u>  | 31.55        | **     |

23

24 **Supplemental Table S2. Targeted search for oligolignols isolated from stem and leaf of *C2-ldf* and *C2* control plants.** b.d.: below detection limit; SD:  
 25 standard deviation, p-values are calculated via Student t-tests statistics. Nomenclature of the oligolignols is explained in Morreel et al., (2004; 2010a;  
 26 2010b), the prime (') signifies an aldehyde moiety.

27

| nr | Name                           | [M-H] <sup>+</sup> | RT (min) | <i>C2</i> internode<br>(Mean ± SD) | <i>C2-ldf</i> internode<br>(Mean ± SD) | p-value | Ratio<br><i>C2-ldf</i> / <i>C2</i> | <i>C2</i> leaf<br>(Mean ± SD) | <i>C2-ldf</i> leaf<br>(Mean ± SD) | p-<br>value | Ratio<br><i>C2-ldf</i> / <i>C2</i> |
|----|--------------------------------|--------------------|----------|------------------------------------|----------------------------------------|---------|------------------------------------|-------------------------------|-----------------------------------|-------------|------------------------------------|
| 1  | <b>G(8-O-4)S(8-5)G 1</b>       | 583.2180           | 14.81    | 29243 ± 7109                       | 39767 ± 20579                          | 0.267   | 1.36                               | 2539 ± 934                    | 2162 ± 896                        | 0.442       | 0.85                               |
| 2  | <b>G(8-O-4)S(8-5)G 2</b>       | 583.2180           | 15.61    | 13912 ± 3862                       | 14941 ± 9379                           | 0.903   | 1.07                               | 1411 ± 648                    | 887 ± 640                         | 0.125       | 0.63                               |
| 3  | <b>G(8-O-4)S(8-8)G</b>         | 583.2194           | 17.04    | 2494 ± 653                         | 4590 ± 3247                            | 0.110   | 1.84                               | b.d.                          | b.d.                              | -           | -                                  |
| 4  | <b>G(8-O-4)S(8-5)G'</b>        | 581.2034           | 16.93    | 2172 ± 4397                        | 1062 ± 826                             | 0.611   | 0.49                               | 2011 ± 546                    | 1889 ± 1202                       | 0.372       | 0.94                               |
| 5  | <b>S(8-O-4)S(8-8)S</b>         | 643.2390           | 16.54    | 713 ± 398                          | 984 ± 727                              | 0.465   | 1.38                               | 3233 ± 2903                   | 2791 ± 742                        | 0.645       | 0.86                               |
| 6  | <b>G(8-O-4)G(8-O-4)S(8-8)S</b> | 809.3000           | 18.09    | 2153 ± 1182                        | 4997 ± 3693                            | 0.083   | 2.32                               | 1110 ± 327                    | 1415 ± 646                        | 0.439       | 1.27                               |

28

29

30 **Supplemental Table S3. Relative quantification of lignin units and linkages based on volume integrals from the HSQC spectra of stem and leaf of C2-Idf**  
 31 **mutant and C2 control plants.** The lignin units were expressed as a percentage of the sum of G (guaiacyl), S' (benzylic-oxidized S units, or syringaldehyde- or  
 32 sinapaldehyde-derived), and S (syringyl) units. The linkage types were expressed as percentage of the sum of interunit linkage types A-C (including C'). Units  
 33 relatively quantified (as volume integrals only) include: cinnamaldehyde end-groups X2; benzaldehyde end-groups X3, phenylcoumaran ( $\beta$ -5) units B,  $\beta$ -aryl  
 34 ether ( $\beta$ -O-4) units A; resinol ( $\beta$ - $\beta$ ) units C; and  $\beta$ - $\beta'$  tetrahydrofuran units C'. n= 6 biological replicates. **Bold or underlined values indicate significantly**  
 35 **increased or decreased values, respectively, as compared to those of the control plants.**, pCA: p-coumarate, H: p-hydroxyphenyl unit, FA: ferulate, T: triclin  
 36 unit. SD: standard deviation, inf: infinite, n.d.: not detected, -: not applicable, n.s.: not significant, \*:0.05<p≤0.01, \*\*: 0.01<p≤0.001, \*\*\*: p<0.001.

| feature                                       | C2 stem<br>(mean ± SD) | C2-Idf stem<br>(mean ± SD) | %<br>difference | t-test | C2 leaf<br>(mean ± SD) | C2-Idf leaf<br>(mean ± SD) | %<br>difference | t-<br>test |
|-----------------------------------------------|------------------------|----------------------------|-----------------|--------|------------------------|----------------------------|-----------------|------------|
| pCA%                                          | 98.2 ± 3.7             | 91.2 ± 4.8                 | -9.1            | n.s    | 56.5 ± 2.7             | <u>52.8 ± 2.3</u>          | <u>-6.5</u>     | *          |
| H%                                            | 1.0 ± 0.1              | <u>0.6 ± 0.2</u>           | <u>-43.3</u>    | *      | 10.1 ± 1.8             | 8.5 ± 1.0                  | -16.4           | n.s.       |
| FA%                                           | 1.8 ± 0.9              | 1.6 ± 0.8                  | -9.5            | n.s.   | 2.4 ± 1.1              | 2.2 ± 0.2                  | -9.3            | n.s.       |
| G%                                            | 25.6 ± 2.3             | <b>30.4 ± 0.5</b>          | <b>18.7</b>     | **     | 55.6 ± 1.4             | 55.3 ± 1.7                 | -0.6            | n.s        |
| S'%                                           | 0.8 ± 0.3              | 0.8 ± 0.2                  | 4.0             | n.s.   | n.d.                   | n.d.                       | -               | -          |
| S%                                            | 73.6 ± 2.2             | <u>68.8 ± 0.6</u>          | <u>-6.6</u>     | **     | 44.4 ± 1.4             | 44.7 ± 1.7                 | 0.7             | n.s        |
| T%                                            | 1.9 ± 0.3              | n.d.                       | <u>inf down</u> | ***    | 27.6 ± 1.4             | <u>n.d.</u>                | <u>inf down</u> | ***        |
| Total (G+S+S')                                | 100                    | 100                        |                 |        | 100                    | 100                        |                 |            |
| S/G                                           | 3.0 ± 0.5              | <u>2.3 ± 0.1</u>           | <u>-20.7</u>    | **     | 0.8 ± 0.1              | 0.8 ± 0.1                  | 1.3             | n.s.       |
| X2 (cinnamaldehyde<br>end-group)%             | 0.9 ± 0.4              | 1.0 ± 0.3                  | 13.5            | n.s.   | n.d.                   | <b>0.4 ± 0.3</b>           | <b>inf up</b>   | **         |
| X3 (benzaldehyde end-<br>group)%              | - ± -                  | 0.1 ± 0.1                  | 66.6            | n.s.   | n.d.                   | n.d.                       | -               | -          |
| B ( $\beta$ -5)%                              | 0.6 ± 0.3              | 0.9 ± 0.6                  | 57.9            | n.s.   | 2.0 ± 0.5              | <b>4.2 ± 0.9</b>           | <b>109.6</b>    | ***        |
| A ( $\beta$ -O-4)%                            | 94.4 ± 0.9             | <u>92.6 ± 1.2</u>          | <u>-2.0</u>     | *      | 97.7 ± 0.7             | <u>93.9 ± 1.5</u>          | <u>-3.9</u>     | ***        |
| C ( $\beta$ - $\beta$ , resinol)%             | 0.3 ± 0.3              | 0.6 ± 0.6                  | 67.6            | n.s.   | 0.3 ± 0.3              | <b>1.2 ± 0.5</b>           | <b>310.3</b>    | **         |
| C' ( $\beta$ - $\beta$ ,<br>tetrahydrofuran)% | 4.7 ± 0.7              | <b>6.0 ± 0.6</b>           | <b>27.9</b>     | *      | n.d.                   | <b>0.7 ± 0.5</b>           | <b>inf up</b>   | ***        |
| Total (A+B+C+C')                              | 100                    | 100                        |                 |        | 100                    | 100                        |                 |            |

37

38

39 **Supplemental Table S4. Saccharification efficiency of senesced stem and leaf biomass from *C2-Idf* mutant and *C2* control plants.** The numbers listed in this  
40 table are visualized in the graphs of Figure 4.

41 See separate file, Supplemental Table S4.xlsx

42
